# Supplementary material for: Fine-tuning the type of equatorial donor atom in pentagonal bipyramidal Dy(iii) complexes to enhance single-molecule magnet properties
Source: Royal Society of Chemistry journal article supplement (doi:10.1039/c9dt03292d), 2019-01-01
Supplement: c9dt03292d1.pdf [file c9dt03292d1.pdf]

***Electronic Supplementary Information***

Fine-tuning the type of equatorial donor atom in pentagonal bipyramidal  
Dy(III) complexes to enhance single-molecule magnet properties

Haipeng Wu,<sup>‡</sup> Min Li,<sup>‡</sup> Bing Yin,\* Zhengqiang Xia,\* Hongshan Ke, Qing Wei, Gang  
Xie, Sanping Chen\* and Shengli Gao

<sup>a</sup> Key Laboratory of Synthetic and Natural Functional Molecule Chemistry of Ministry of Education, College of  
Chemistry and Materials Science, Northwest University, Xi'an, 710127, China.

<sup>‡</sup> These authors contributed equally to this work.

**\*Corresponding authors**

**Prof. Bing Yin**

**E-mail: [rayinyin@nwu.edu.cn](mailto:rayinyin@nwu.edu.cn)**

**Dr. Zhengqiang Xia**

**E-mail: [northwindy@126.com](mailto:northwindy@126.com)**

**Prof. Sanping Chen**

**E-mail: [sanpingchen@126.com](mailto:sanpingchen@126.com)**

# 1. Crystal Data and Structures

**Table S1.** Crystal data and structure refinement summary for complexes **1-3** and **1CH<sub>3</sub>**.

|                                                                 | <b>1</b>                                                         | <b>2</b>                                                                          | <b>3</b>                                                                                         | <b>1CH<sub>3</sub></b>                                           |
|-----------------------------------------------------------------|------------------------------------------------------------------|-----------------------------------------------------------------------------------|--------------------------------------------------------------------------------------------------|------------------------------------------------------------------|
| Empirical formula                                               | C <sub>14</sub> H <sub>18</sub> Cl <sub>3</sub> DyN <sub>4</sub> | C <sub>26</sub> H <sub>22</sub> Br <sub>4</sub> ClDyN <sub>6</sub> O <sub>6</sub> | C <sub>96</sub> H <sub>72</sub> Cl <sub>18</sub> Dy <sub>3</sub> N <sub>21</sub> O <sub>27</sub> | C <sub>16</sub> H <sub>22</sub> Cl <sub>3</sub> DyN <sub>4</sub> |
| Formula weight                                                  | 511.17                                                           | 1032.08                                                                           | 3077.34                                                                                          | 539.22                                                           |
| Crystal system                                                  | Monoclinic                                                       | Triclinic                                                                         | Monoclinic                                                                                       | Monoclinic                                                       |
| Temperature (K)                                                 | 296.15 K                                                         | 293 K                                                                             | 100 K                                                                                            | 296.15 K                                                         |
| Space group                                                     | <i>P</i> 2 <sub>1</sub> / <i>c</i>                               | <i>P</i> $\bar{1}$                                                                | <i>P</i> 2 <sub>1</sub> / <i>c</i>                                                               | <i>P</i> 2 <sub>1</sub>                                          |
| <i>a</i> (Å)                                                    | 11.8991(12)                                                      | 8.2337(8)                                                                         | 23.3141(7)                                                                                       | 8.5713(10)                                                       |
| <i>b</i> (Å)                                                    | 9.1987(9)                                                        | 11.3866(8)                                                                        | 18.7255(6)                                                                                       | 14.3669(17)                                                      |
| <i>c</i> (Å)                                                    | 16.9903(17)                                                      | 18.9912(14)                                                                       | 26.6532(7)                                                                                       | 8.9521(10)                                                       |
| $\alpha$ (°)                                                    | 90                                                               | 93.466(6)                                                                         | 90                                                                                               | 90                                                               |
| $\beta$ (°)                                                     | 90.659(2)                                                        | 95.632(7)                                                                         | 90.3870(10)                                                                                      | 115.407(2)                                                       |
| $\gamma$ (°)                                                    | 90                                                               | 110.499(9)                                                                        | 90                                                                                               | 90                                                               |
| <i>V</i> (Å <sup>3</sup> )                                      | 1859.6(3)                                                        | 1651.1(3)                                                                         | 11635.7(6)                                                                                       | 995.8(2)                                                         |
| <i>Z</i>                                                        | 4                                                                | 2                                                                                 | 4                                                                                                | 2                                                                |
| <i>D<sub>c</sub></i> (g m <sup>-3</sup> )                       | 1.826                                                            | 2.076                                                                             | 1.757                                                                                            | 1.798                                                            |
| $\mu$ (mm <sup>-1</sup> )                                       | 4.449                                                            | 18.939                                                                            | 2.401                                                                                            | 4.16                                                             |
| <i>F</i> (000)                                                  | 988                                                              | 982                                                                               | 6060                                                                                             | 526                                                              |
| Reflns                                                          | 10044/3991                                                       | 10925/5812                                                                        | 112854/23605                                                                                     | 5335/3619                                                        |
| <i>R</i> <sub>int</sub>                                         | 0.0260                                                           | 0.0727                                                                            | 0.0559                                                                                           | 0.0181                                                           |
| GOF on <i>F</i> <sup>2</sup>                                    | 1.031                                                            | 1.105                                                                             | 1.057                                                                                            | 0.922                                                            |
| <i>R</i> <sub>1</sub> <sup>a</sup> [ <i>I</i> > 2σ( <i>I</i> )] | 0.0254                                                           | 0.0801                                                                            | 0.0744                                                                                           | 0.0181                                                           |
| <i>wR</i> <sub>2</sub> <sup>b</sup> (all data)                  | 0.0560                                                           | 0.1924                                                                            | 0.1879                                                                                           | 0.0444                                                           |
| CCDC                                                            | 1910325                                                          | 1910326                                                                           | 1910327                                                                                          | 1911489                                                          |

$$^a R_1 = \Sigma(|F_o| - |F_c|) / \Sigma |F_o|, \quad ^b wR_2 = [\Sigma w(F_o^2 - F_c^2)^2 / \Sigma w(F_o^2)^2]^{1/2}.$$

**Table S2.** Shape analysis for the metal centers of complexes **1-3** and **1CH<sub>3</sub>**.

| complex <b>1</b>               | HP-7   | HPY-7  | PBPY-7       | COC-7 | CTPR-7 | JPBPY-7 | JETPY-7 |
|--------------------------------|--------|--------|--------------|-------|--------|---------|---------|
| Dy1                            | 34.504 | 26.067 | <b>0.828</b> | 8.465 | 6.650  | 4.865   | 23.873  |
| complex <b>2</b>               | HP-7   | HPY-7  | PBPY-7       | COC-7 | CTPR-7 | JPBPY-7 | JETPY-7 |
| Dy1                            | 32.271 | 23.094 | <b>2.086</b> | 6.915 | 5.598  | 3.353   | 19.154  |
| complex <b>3</b>               | HP-7   | HPY-7  | PBPY-7       | COC-7 | CTPR-7 | JPBPY-7 | JETPY-7 |
| Dy1                            | 33.468 | 23.367 | <b>1.114</b> | 7.347 | 5.675  | 2.696   | 22.901  |
| Dy2                            | 32.750 | 23.469 | <b>1.090</b> | 6.685 | 4.879  | 2.896   | 21.517  |
| Dy3                            | 33.39  | 23.553 | <b>0.808</b> | 8.505 | 6.782  | 2.497   | 23.578  |
| complex <b>1CH<sub>3</sub></b> | HP-7   | HPY-7  | PBPY-7       | COC-7 | CTPR-7 | JPBPY-7 | JETPY-7 |
| Dy1                            | 33.736 | 25.052 | <b>0.795</b> | 6.655 | 4.793  | 4.632   | 23.234  |

HP-7 ( $D_{7h}$ ): Heptagon  
 HPY-7 ( $C_{6v}$ ): Hexagonal pyramid  
 PBPY-7 ( $D_{5h}$ ): Pentagonal bipyramid  
 COC-7 ( $C_{3v}$ ): Capped octahedron  
 CTPR-7 ( $C_{2v}$ ): Capped trigonal prism  
 JPBPY-7 ( $D_{5h}$ ): Johnson pentagonal bipyramid J13  
 JETPY-7 ( $C_{3v}$ ): Johnson elongated triangular pyramid J7

**Table S3.** Comparison of some crucial structural data for Schiff base complexes (**1'**-**3'**), reductive Schiff base complexes (**1-3**) and methylated complex (**1CH<sub>3</sub>**).

| Parameters                                                       | <b>1'</b>           | <b>1</b>             | <b>1CH<sub>3</sub></b> |  |
|------------------------------------------------------------------|---------------------|----------------------|------------------------|--|
| Dy-N <sub>imine</sub> /Dy-N <sub>amine</sub> (Å)                 | 2.467(2)/2.481(2)   | 2.491(3)/2.510(3)    | 2.596(4)/2.579(4)      |  |
| Dy-N <sub>equatorial</sub> (average) (Å)                         | 2.5095              | 2.5325               | 2.572                  |  |
| Dy-O/Dy-Cl <sub>equatorial</sub> (Å)                             | 2.6112(11)          | 2.6237(10)           | 2.6186(16)             |  |
| Dy-O/Dy-Cl <sub>axial</sub> (Å)                                  | 2.5949(9)/2.6351(9) | 2.5964(10)/2.6222(9) | 2.6245(16)/2.5913(14)  |  |
| ∠O-Dy-O/Cl-Dy-Cl (°)                                             | 168.52(2)           | 170.40(3)            | 171.06(5)              |  |
| r.m.s. deviation <sup>a</sup> of tetradentate coordination atoms | 0.1342              | 0.0060               | 0.1059                 |  |
| r.m.s. deviation of pentagon coordination atoms                  | 0.1875              | 0.0549               | 0.1387                 |  |

  

| Parameters                                          | <b>2'</b> | <b>2</b>            | <b>3'</b>         | <b>3</b> |
|-----------------------------------------------------|-----------|---------------------|-------------------|----------|
| Dy-N <sub>imine</sub> /Dy-N <sub>amine</sub> (Å)    | 2.490(8)  | 2.538(12)/2.517(10) | 2.493(3)/2.494(3) | 2.494    |
| Dy-N <sub>equatorial</sub> (average) (Å)            | 2.523     | 2.5345              | 2.520             | 2.5166   |
| Dy-O/Dy-Cl <sub>equatorial</sub> (Å)                | 2.616(3)  | 2.620(3)            | 2.203(2)          | 2.202    |
| Dy-O/Dy-Cl <sub>axial</sub> (Å)                     | 2.174(4)  | 2.175(7)/2.200(8)   | 2.187(2)/2.201(2) | 2.187    |
| ∠O-Dy-O/Cl-Dy-Cl (°)                                | 165.6(3)  | 173.4(3)            | 166.06(8)         | 167.87   |
| r.m.s. deviation of tetradentate coordination atoms | 0.2049    | 0.0054              | 0.2111            | 0.0956   |
| r.m.s. deviation of pentagon coordination atoms     | 0.1833    | 0.2521              | 0.2235            | 0.0899   |

<sup>a</sup> Deviations from the Least-squares planes defined by tetradentate and pentagon coordination atoms.

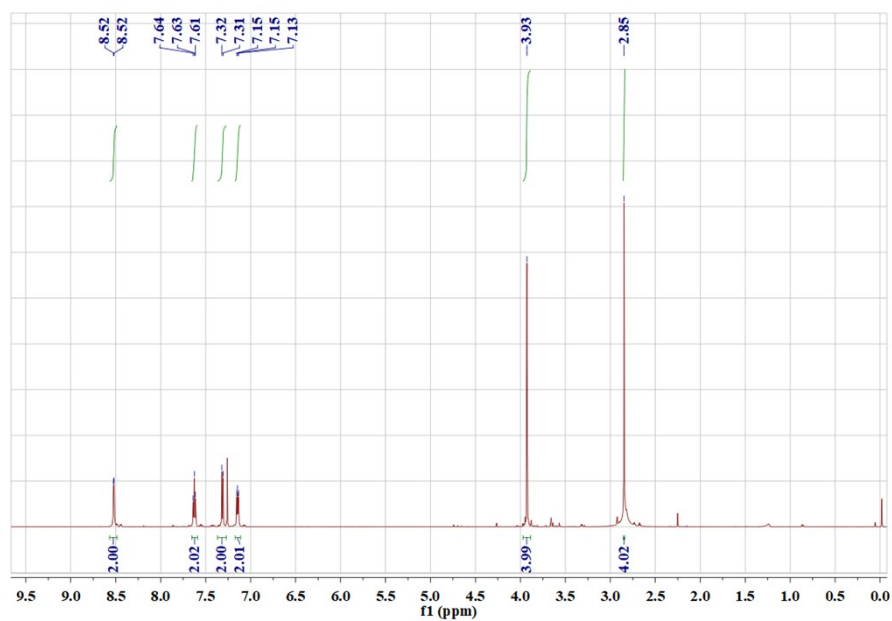

Fig. S1.  $^1\text{H}$  NMR spectrum of Hbpen.

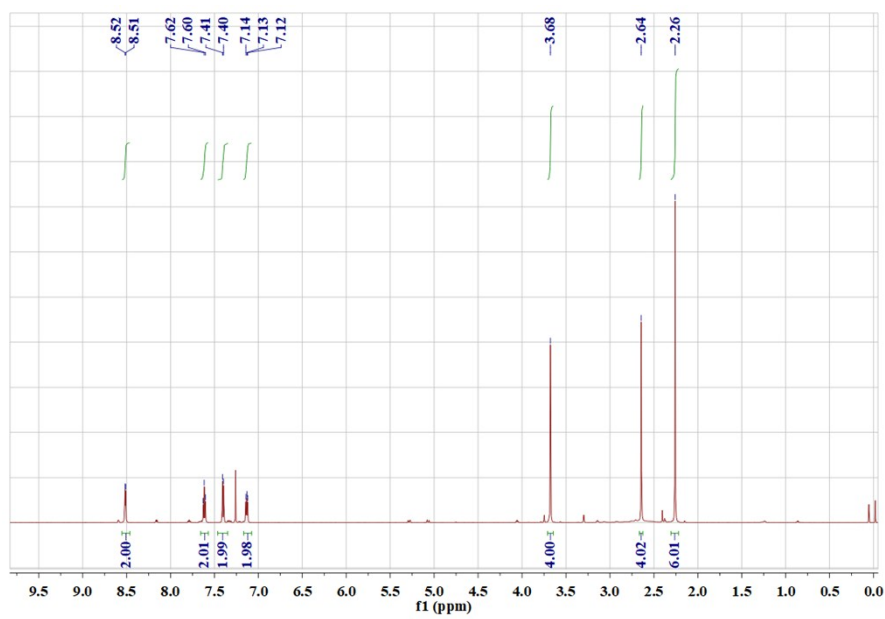

Fig. S2.  $^1\text{H}$  NMR spectrum of Mbpen.

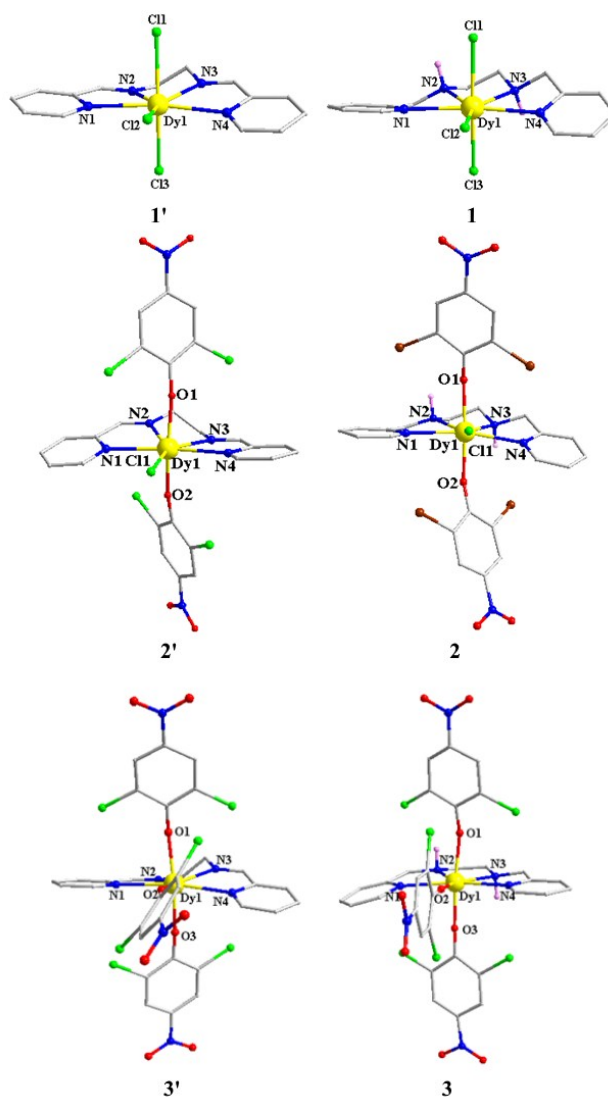

**Fig. S3.** Coordination environment of the Dy<sup>III</sup> center for Schiff base complexes **1'-3'** and reductive Schiff base complexes **1-3**. Yellow, blue, red, green, brown, light grey and light pink spheres represent Dy, N, O, Cl, C and H, respectively; non-amino hydrogen atoms and counter ions are removed for clarity.

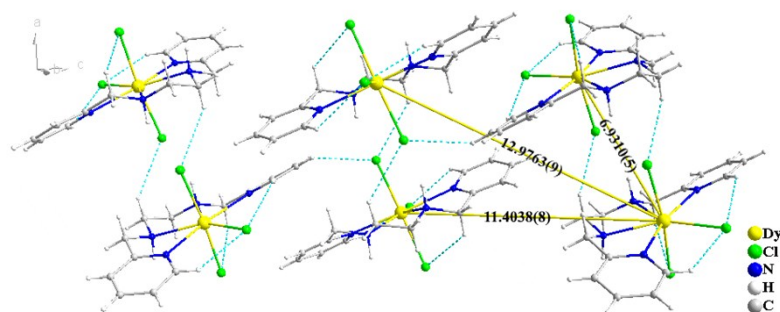

**Fig. S4.** The supramolecular network for **1**. The dash lines correspond intramolecular or intermolecular hydrogen bond (Cl $\cdots$ H-C). The yellow solid lines correspond the adjacent distances ( $\text{\AA}$ ) of Dy<sup>III</sup> ions in **1**.

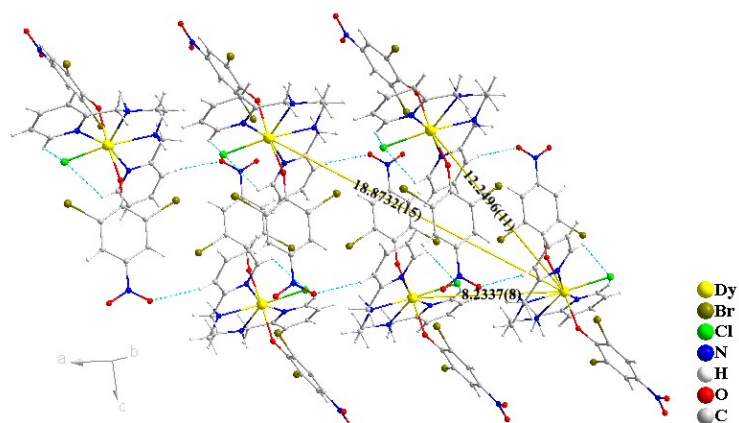

**Fig. S5.** The supramolecular network for **2**. The dash lines correspond intramolecular (Cl...H-C) and intermolecular hydrogen bond (O...H-C). The yellow solid lines correspond the adjacent distances (Å) of Dy<sup>III</sup> ions in **2**.

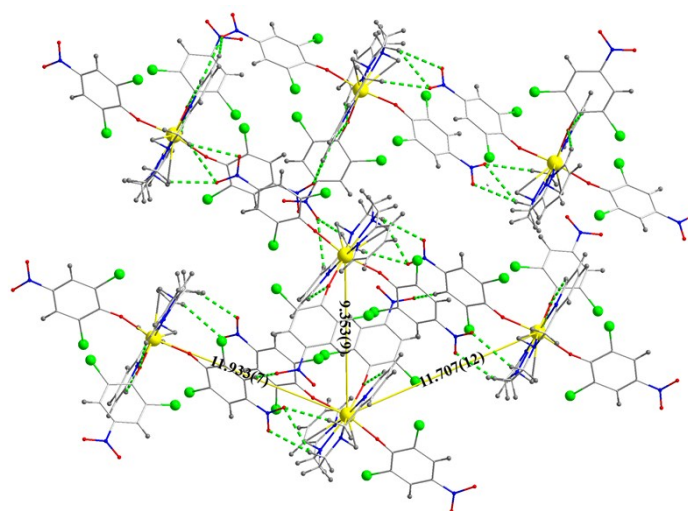

**Fig. S6.** The supramolecular network for **3**. The dash lines correspond intramolecular or intermolecular hydrogen bond (O...H-C). The yellow solid lines correspond the adjacent distances (Å) of Dy<sup>III</sup> ions in **3**.

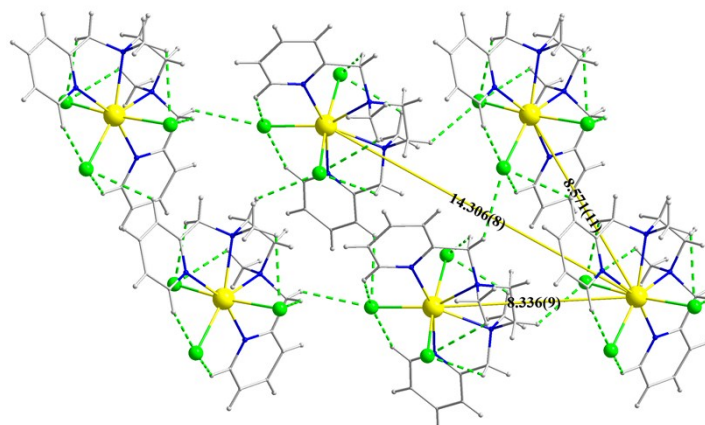

**Fig. S7.** The supramolecular network for **1CH<sub>3</sub>**. The dash lines correspond intramolecular or

intermolecular hydrogen bond (Cl $\cdots$ H-C). The yellow solid lines correspond the adjacent distances ( $\text{\AA}$ ) of Dy<sup>III</sup> ions in **1CH<sub>3</sub>**.

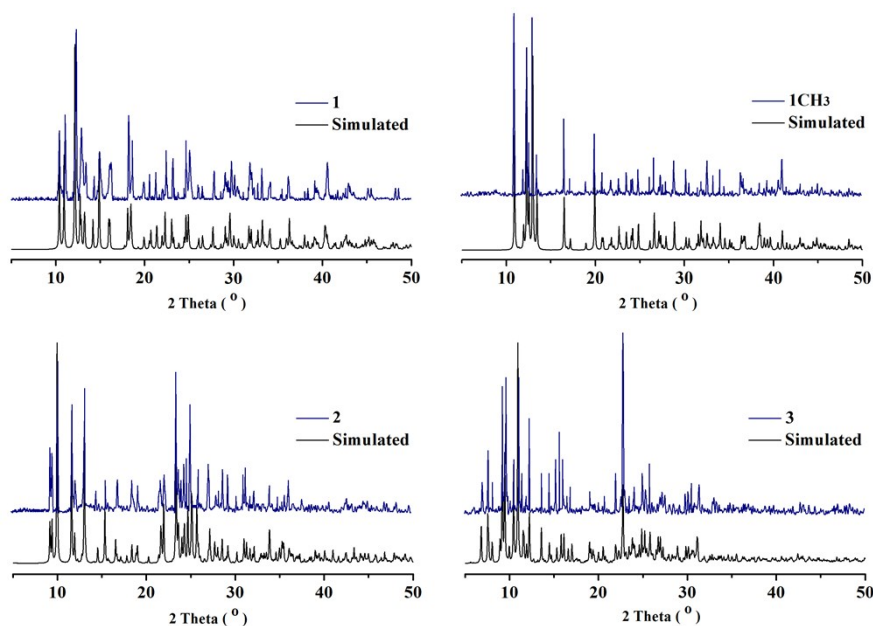

**Fig. S8.** Experimental X-ray powder diffraction patterns for **1-3** and **1CH<sub>3</sub>** at room temperature.

## 2. Magnetic measurements

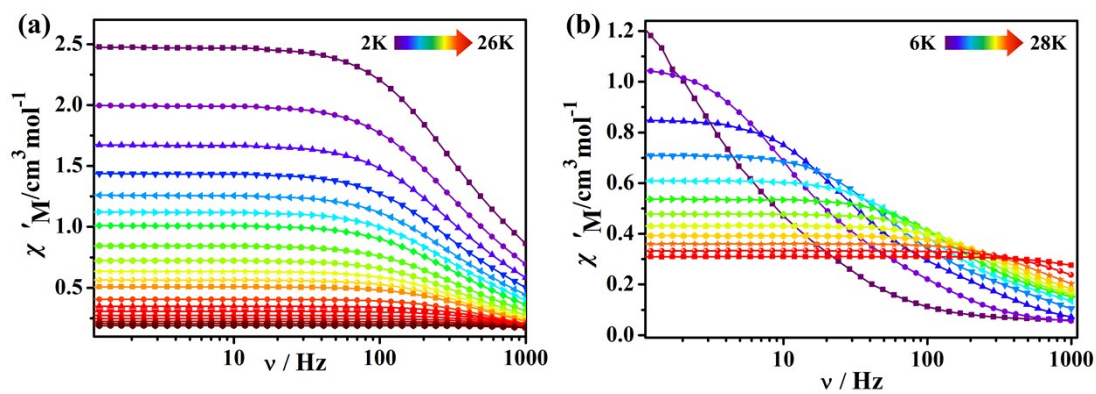

**Fig. S9.** Frequency dependence of the in-phase  $\chi'$  ac susceptibility signals for **2** under 0 Oe (a) and 1200 Oe (b) dc fields.

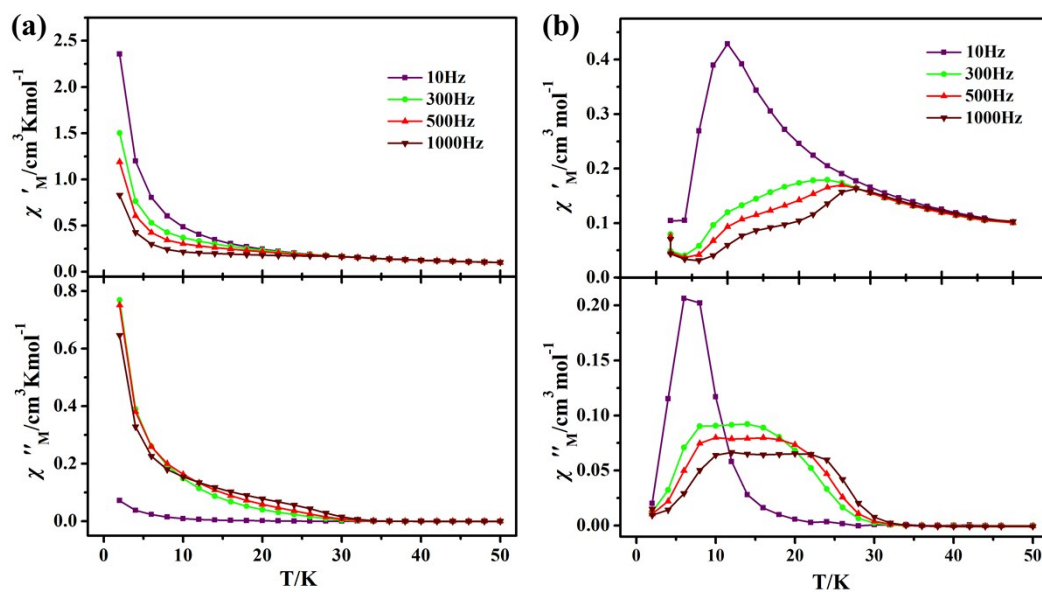

**Fig. S10.** Temperature-dependent in-phase  $\chi'$  (top) and out-of-phase  $\chi''$  (bottom) ac susceptibility signals for **2** under 0 Oe (a) and 1200 Oe (b) dc fields.

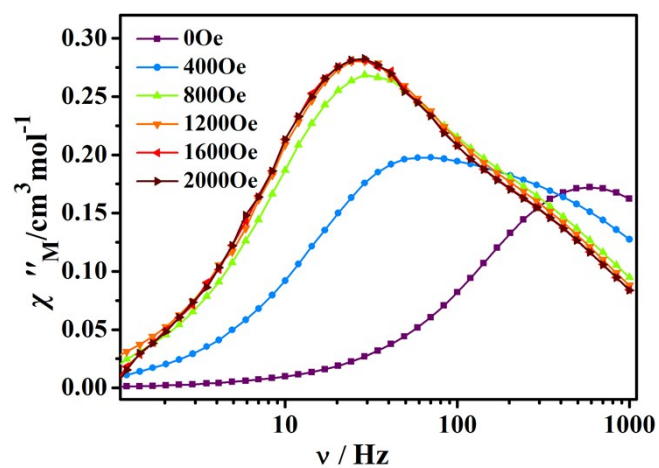

**Fig. S11.** Field dependence of the out-of-phase signal vs frequency at 10 K for **2**.



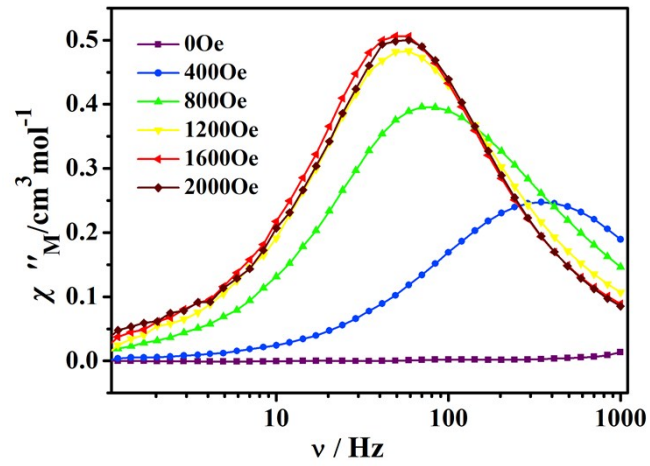

**Fig. S12.** Field dependence of the out-of-phase signal vs frequency at 5 K for **1**.

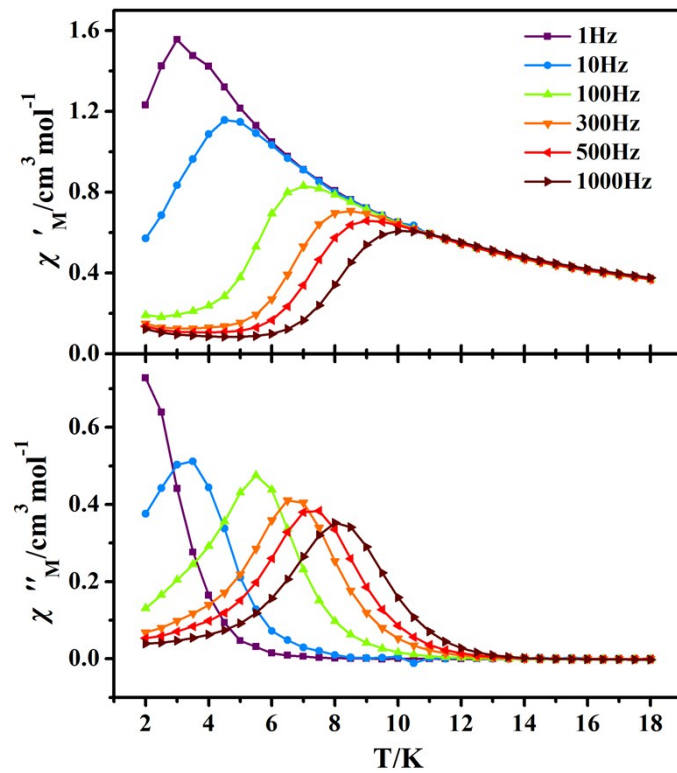

**Fig. S13.** Temperature-dependent in-phase  $\chi'$  (top) and out-of-phase  $\chi''$  (bottom) ac susceptibility signals under 1600 Oe dc field for **1**.

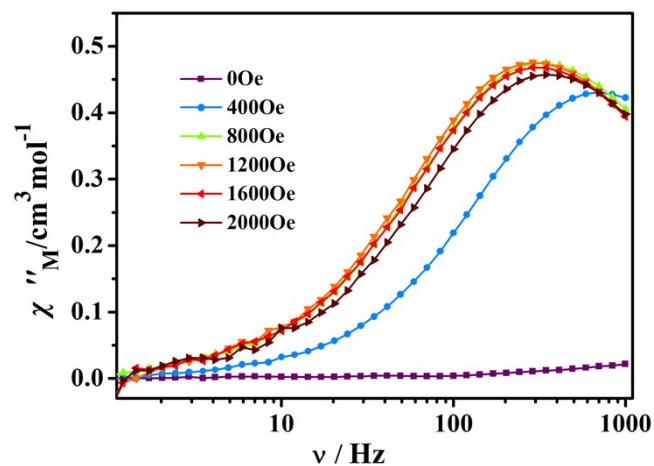

**Fig. S14.** Field dependence of the out-of-phase signal vs frequency at 5 K for **3**.

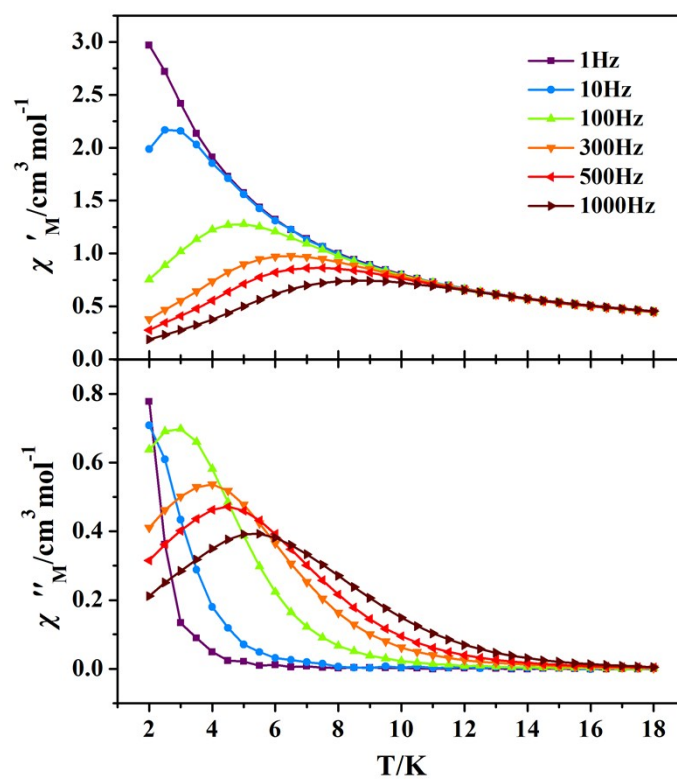

**Fig. S15.** Temperature-dependent in-phase  $\chi'$  (top) and out-of-phase  $\chi''$  (bottom) ac susceptibility signals under 1200 Oe dc field for **3**.

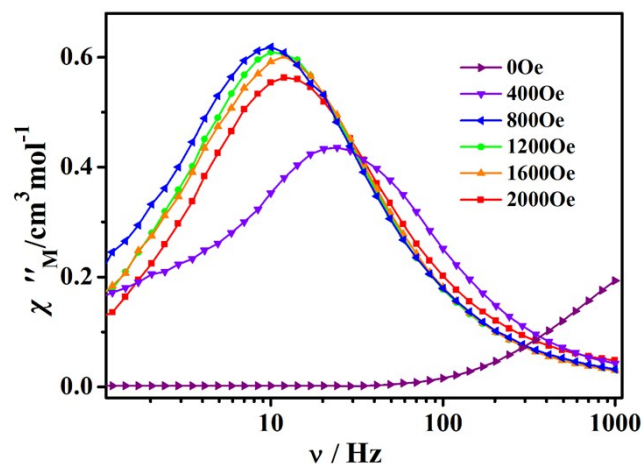

**Fig. S16.** Field dependence of the out-of-phase signal vs frequency at 3.5 K for  $1\text{CH}_3$ .

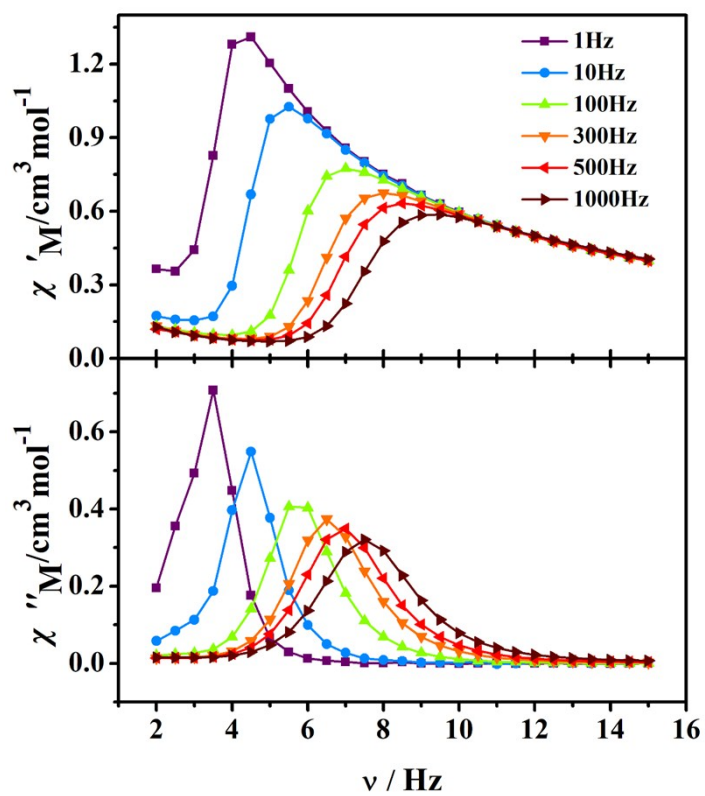

**Fig. S17.** Temperature-dependent in-phase  $\chi'$  (top) and out-of-phase  $\chi''$  (bottom) ac susceptibility signals under 800 Oe dc field for  $1\text{CH}_3$ .

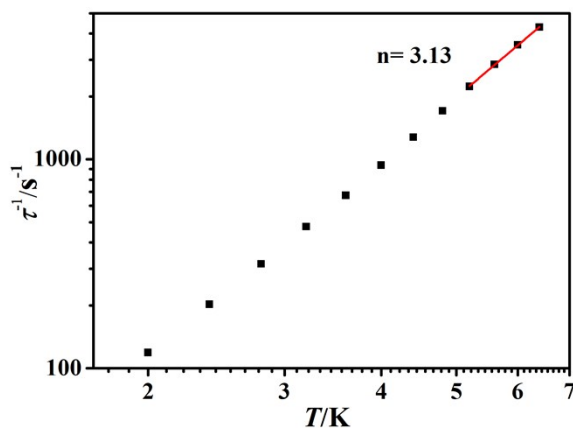

**Fig. S18.** The plots of  $\tau^{-1}$  vs.  $T$  in a log-log scale for **3** under 1200 Oe dc field. The solid lines are fitness by a power law with parameters  $n = 3.13$  above 5.2 K.

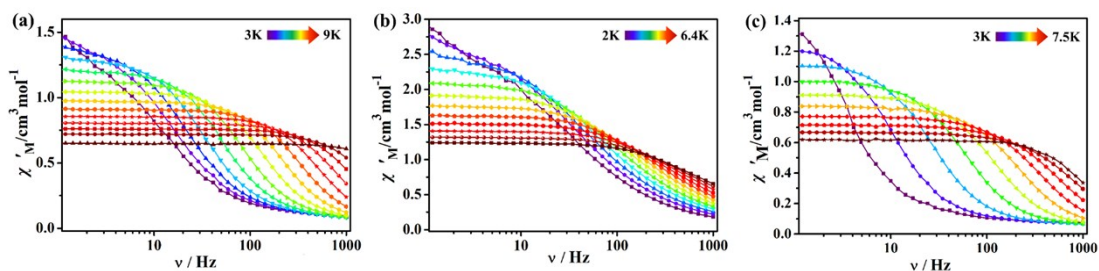

**Fig. S19.** Frequency dependence of the in-phase  $\chi'$  ac susceptibility signals for **1** under 1600 Oe dc field (a), for **3** under 1200 Oe dc field (b) and for **1CH<sub>3</sub>** under 800 Oe dc field (c).

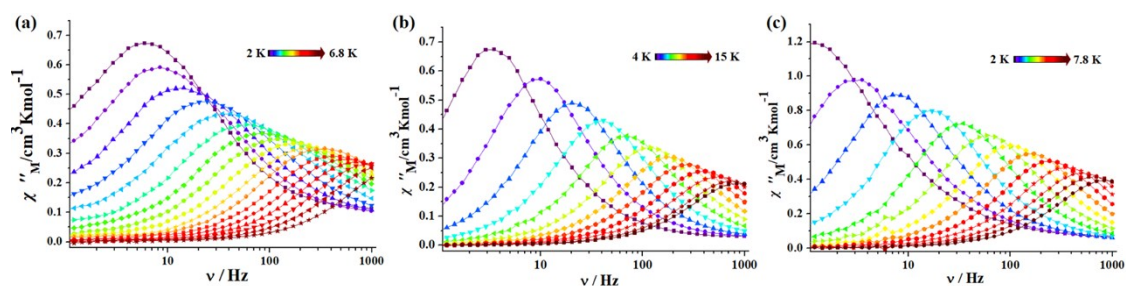

**Fig. S20.** Frequency-dependent out-of phase  $\chi''$  ac susceptibility signals for reported complexes **1'** (a), **2'** (b) and **3'** (c).

**Table S4.** Comparison of magnetic properties for Schiff base complexes (**1'-3'**), reductive Schiff base complexes (**1-3**) and methylated complex (**1CH<sub>3</sub>**).

| Complex   | $U_{\text{eff}}$ (K) | $H_{\text{dc}}$ /Oe | Hysteresis (K) |
|-----------|----------------------|---------------------|----------------|
| <b>1'</b> | 22.4                 | 800                 | -              |

|                        |                   |      |   |
|------------------------|-------------------|------|---|
| <b>1</b>               | 63.4              | 1600 | - |
| <b>1CH<sub>3</sub></b> | 37.1              | 800  | - |
| <b>2'</b>              | 85.8              | 1000 | - |
| <b>2</b>               | 181.7             | 0    | 3 |
|                        | 254.2             | 1200 |   |
| <b>3'</b>              | 34.2              | 800  | - |
| <b>3</b>               | <sup>a</sup> 21.3 | 1200 | - |

<sup>a</sup> The experimentally determined apparent energy barrier value.

### 3. *Ab initio* calculations

Multiconfigurational *ab initio* calculations, including spin-orbit coupling (SOC), were performed on the experimental structures of **1-3** and **1CH<sub>3</sub>** to explore their magnetic anisotropy. This type of calculation consists of two steps <sup>1</sup>: 1) a set of SOC-free states, that is, spin eigenstates, are obtained by the CASSCF method; 2) the lowlying SOC states, that is, Kramers doublets (KD) herein, are obtained by state interaction, i.e., diagonalizing the SOC matrix in the space spanned by the spin eigenstates from the first step. All calculations were carried out with the MOLCAS@UU, a freely distributed version of MOLCAS 8.0 program.<sup>2,3</sup> In the CASSCF step, the active space consisted of 9 electrons in 7 orbitals and all the spin eigenstates of 21 sextets were included. Due to the limitation in the aspect of hardware, other highly excited quartets and doublets were not considered. The subsequent step of state interaction was performed by the RASSI-SO module. The ANO-RCC basis sets, including VTZP for Dy, VDZ for C and H as well as VDZP for other atoms, were used. The extraction procedure according to Chibotaru *et. al.* was performed to obtain the g-tensors and transition magnetic moments of low-lying KDs with the SINGLE ANISO module.<sup>4,5</sup>

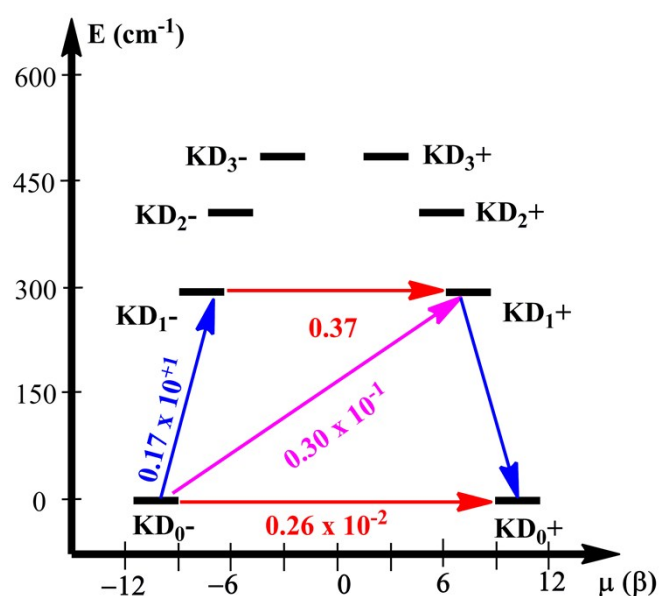

**Fig. S21** *Ab initio* predicted effective energy barriers for complex **2** with the red arrows indicating the possibility of QTM and the blue and pink arrows indicating the possibilities of other processes of spin-phonon relaxation.

**Table S5.** Natural Population Analysis (NPA) charge from the LoProp module of MOLCAS code of selected atoms for complexes **1'-3'**, **1-3** and **1CH<sub>3</sub>**.

| coordination |               |               | charge(a.u.)   |           |                        | coordination  |           |               | charge(a.u.)  |          |       | coordination |  |           | charge(a.u.) |  |  |
|--------------|---------------|---------------|----------------|-----------|------------------------|---------------|-----------|---------------|---------------|----------|-------|--------------|--|-----------|--------------|--|--|
| atoms        |               |               | <b>1'</b>      | <b>1</b>  | <b>1CH<sub>3</sub></b> | atoms         |           |               | <b>2'</b>     | <b>2</b> | atoms |              |  | <b>3'</b> | <b>3</b>     |  |  |
| Cl1          | -0.862        | -0.862        | -0.8614        | O1        | -0.855                 | -0.845        | O1        | -0.852        | -0.887        |          |       |              |  |           |              |  |  |
| Cl3          | -0.867        | -0.866        | -0.8617        | O2        | -0.855                 | -0.875        | O2        | -0.850        | -0.833        |          |       |              |  |           |              |  |  |
| Cl2          | -0.863        | -0.860        | -0.8574        | Cl1       | -0.862                 | -0.859        | O3        | -0.859        | -0.880        |          |       |              |  |           |              |  |  |
| N1           | -0.321        | -0.348        | -0.3474        | N1        | -0.315                 | -0.346        | N1        | -0.324        | -0.337        |          |       |              |  |           |              |  |  |
| N4           | -0.322        | -0.346        | -0.3483        | N4        | -0.315                 | -0.351        | N4        | -0.323        | -0.348        |          |       |              |  |           |              |  |  |
| <b>N2</b>    | <b>-0.322</b> | <b>-0.418</b> | <b>-0.2978</b> | <b>N2</b> | <b>-0.325</b>          | <b>-0.413</b> | <b>N2</b> | <b>-0.320</b> | <b>-0.410</b> |          |       |              |  |           |              |  |  |
| <b>N3</b>    | <b>-0.318</b> | <b>-0.415</b> | <b>-0.3005</b> | <b>N3</b> | <b>-0.325</b>          | <b>-0.418</b> | <b>N3</b> | <b>-0.314</b> | <b>-0.422</b> |          |       |              |  |           |              |  |  |

**Table S6.** The nearest-neighbour distances  $r_{nn}$  and use the value  $R$ , which is the sum of all the nearest-neighbour  $r_{nn}^{-3}$ , as a semi-quantitative parameter describing the internal dipolar field.

| <b>3'</b>         |               | <b>3</b>          |               |
|-------------------|---------------|-------------------|---------------|
| $r_{nn}$ (in Å)   | $r_{nn}^{-3}$ | $r_{nn}$ (in Å)   | $r_{nn}^{-3}$ |
| 9.961             | 0.001011792   | 9.353             | 0.001222214   |
| 10.323            | 0.000909038   | 9.804             | 0.001061183   |
| 10.5              | 0.000863838   | 10.859            | 0.000780963   |
| 10.586            | 0.000842955   | 10.918            | 0.000768371   |
| 11.377            | 0.000679073   | 11.141            | 0.000723148   |
| 11.599            | 0.000640823   | 11.212            | 0.000709497   |
| 12.247            | 0.000544391   | 11.752            | 0.000616119   |
| 12.281            | 0.000539882   | 11.878            | 0.000596719   |
| 13.370            | 0.000418414   | 12.877            | 0.000468334   |
| 14.388            | 0.000335737   | 14.868            | 0.000304258   |
| 16.433            | 0.000225346   | 18.483            | 0.000158374   |
| 17.990            | 0.000171754   | 18.552            | 0.000156613   |
| 19.385            | 0.000137279   | 20.626            | 0.000113961   |
| $R = 0.007320321$ |               | $R = 0.007679754$ |               |

## 4. References

- 1 J. Luzon and R. Sessoli, *Dalton trans.*, **2012**, *41*, 13556-13567.
- 2 F. Aquilante, L. De Vico, N. Ferré, G. Ghigo, P.-Å. Malmqvist, P. Neogrady, T. B. Pedersen, M. Pitoňák, M. Reiher, B. O. Roos, L. Serrano-Andrés, M. Urban, V. Veryazov and R. Lindh, *J. Comput. Chem.*, **2010**, *31*, 224-247.
- 3 F. Aquilante, J. Autschbach, R. K. Carlson, L. F. Chibotaru, M. G. Delcey, L. De Vico, I. Fdez. Galván, N. Ferré, L. M. Frutos, L. Gagliardi, M. Garavelli, A. Giussani, C. E. Hoyer, G. Li Manni, H. Lischka, D. Ma, P. Å. Malmqvist, T. Müller, A. Nenov, M. Olivucci, T. B. Pedersen, D. Peng, F. Plasser, B. Pritchard, M. Reiher, I. Rivalta, I. Schapiro, J. Segarra-Martí, M. Stenrup, D. G. Truhlar, L. Ungur, A. Valentini, S. Vancoillie, V. Veryazov, V. P. Vysotskiy, O. Weingart, F. Zapata and R. Lindh, *J. Comput. Chem.*, **2016**, *37*, 506-541.
- 4 L. F. Chibotaru, *Adv. Chem. Phys.*, **2013**, *153*, 397-519.
- 5 L. F. Chibotaru and L. Ungur, *J. Chem. Phys.*, **2012**, *137*, 064112.
